# Supplementary material for: Cellulose-based self-healing hydrogel through boronic ester bonds with excellent biocompatibility and conductivity
Source: Royal Society of Chemistry journal article supplement (doi:10.1039/c9ra10736c), 2020-01-01
Supplement: c9ra10736c1.pdf [file c9ra10736c1.pdf]

Support information for

## Cellulose-Based Self-healing Hydrogel through Boronic Ester Bond with Excellent Biocompatibility and Conductivity

Heng An,<sup>a</sup> Yunyi Bo,<sup>b</sup> Danyang Chen,<sup>a</sup> Yong Wang,<sup>c</sup> Haijun Wang,<sup>a</sup> Yingna He,<sup>b\*</sup> Jianglei Qin<sup>a,c\*</sup>

<sup>a</sup>College of Chemistry and Environmental Science, Hebei University, Baoding City, Hebei Province 071002, China; qinhbu@iccas.ac.cn (J. Q.)

<sup>b</sup>Hebei Key Laboratory of Chinese Medicine Research on Cardio-Cerebrovascular Disease, Pharmaceutical College, Hebei University of Chinese Medicine, Shijiazhuang City, Hebei Province 050200, China

<sup>c</sup>Key Laboratory of Pathogenesis mechanism and control of inflammatory-autoimmune diseases in Hebei Province, Hebei University, Baoding City, Hebei Province 071002, China

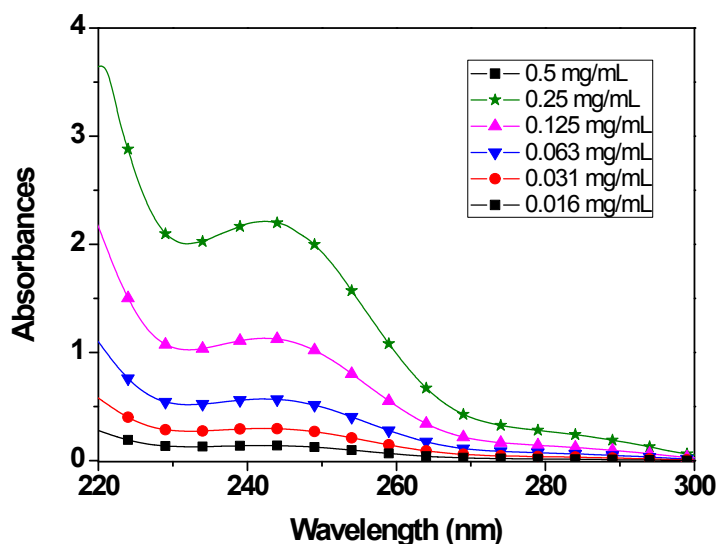

Figure S1. UV absorbance of CMC-B(OH)<sub>2</sub> at various concentrations.

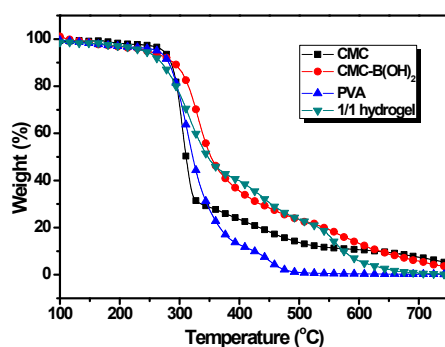

Figure S2. TGA curves of the hydrogel (2%) and its precursors.

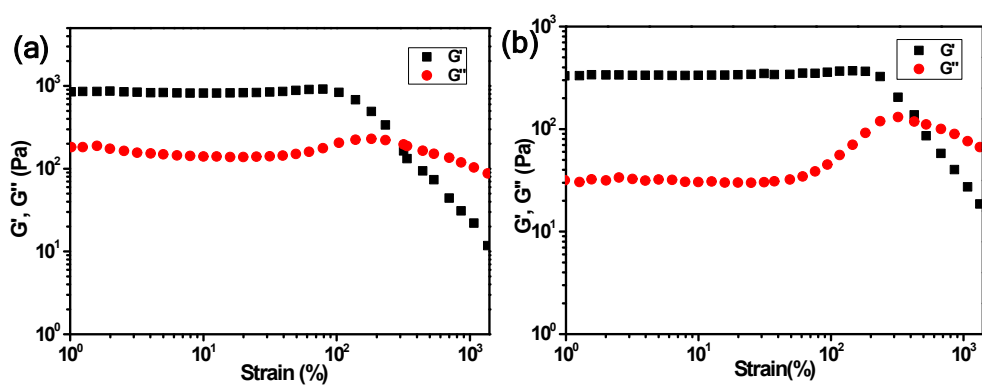

**Figure S3.** The strain scan of the 2/1 hydrogels with (a) 2% and (b) 1% gelator concentration.

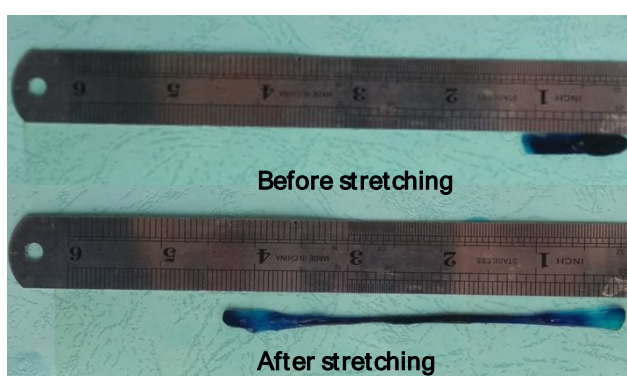

**Figure S4.** The comparison of the 2% hydrogel with 1/1 ratio before and after stretching.

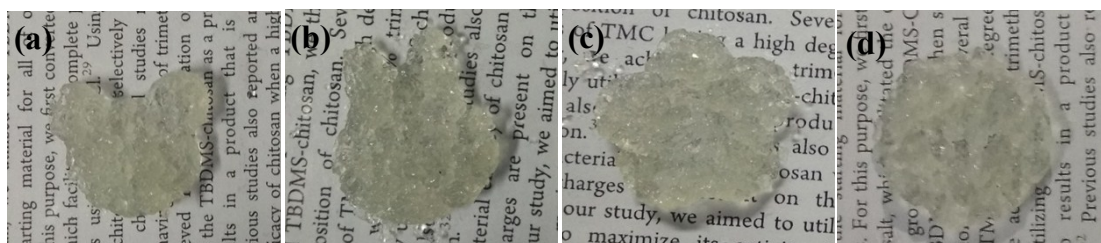

**Figure S5.** Hydrogels self-healed from injected particles with various shapes for 10 min.

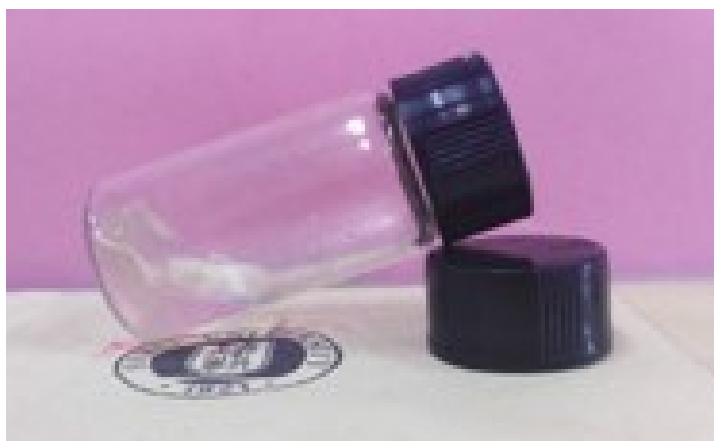

**Figure S6.** Phase separation of the hydrogel after addition of HCl.

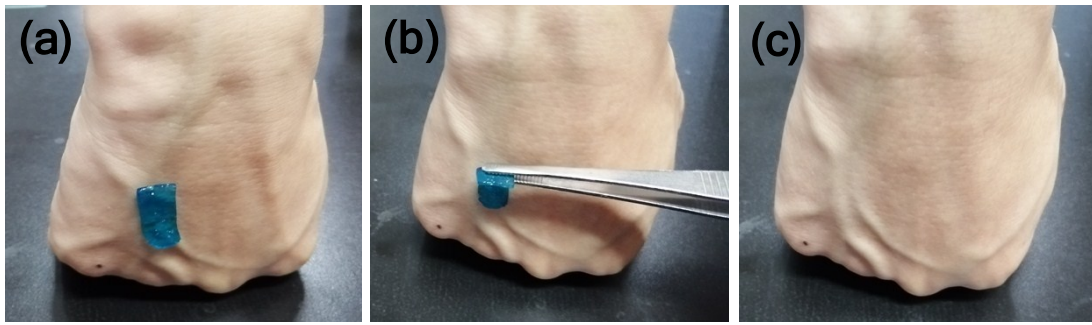

**Figure S7.** The skin stuck hydrogel can attach onto the skin and removed easily without any residue.
